# Supplementary material for: Respiratory Colonization and Short-Term Temporal Changes in the Urinary Metabolome of Children
Source: MDPI journal article supplement (doi:10.3390/metabo11080500), 2021-07-30
Supplement: s1 [file s1]

# Respiratory Colonization and Short-Term Temporal Changes in the Urinary Metabolome of Children

## Supplementary Materials:

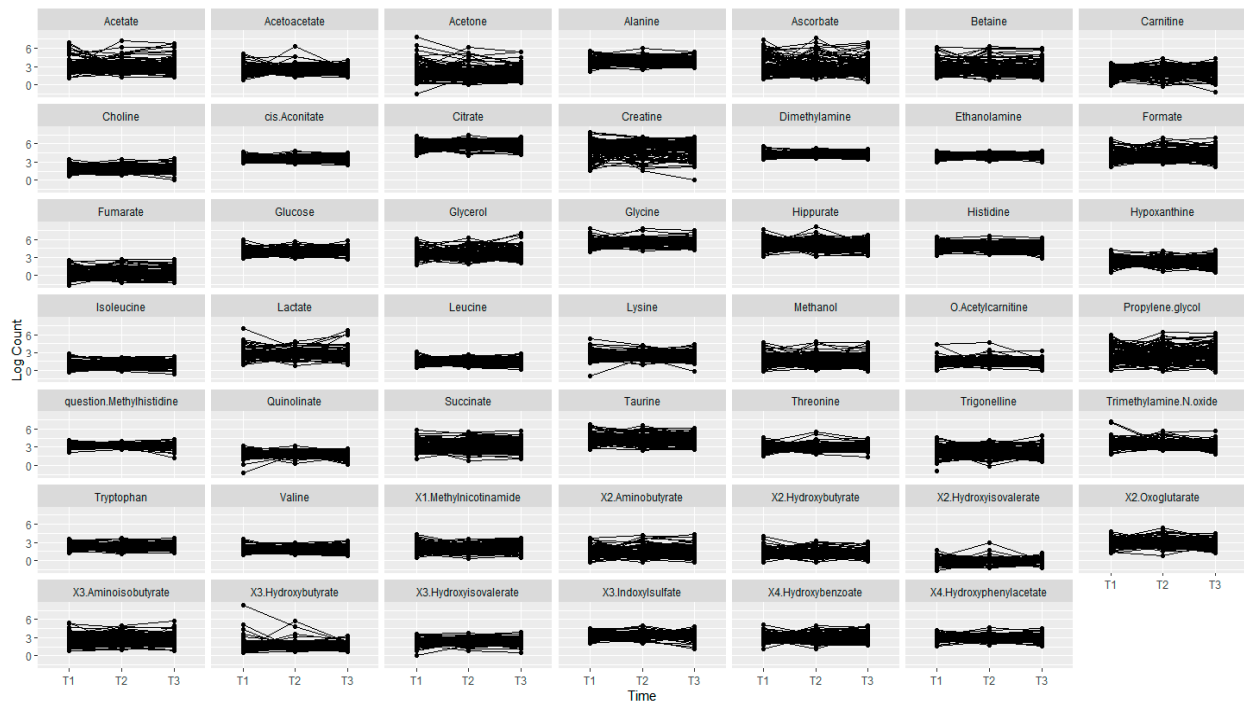

**Figure S1. Stick Plots of Changes by Metabolite.** Comparison of time points (x-axis) and log concentration of each metabolite (y-axis) identified from 122 healthy children (metabolites are ordered from most statistically significant changes to least statistically significant change). Each line represents an individual subject and their corresponding time points.

**Table S1. Geometric mean and standard deviation of individual metabolites at each time point.**

| Metabolite             | Time Point                 |              |              | P-Value* | Adjusted P-value** |
|------------------------|----------------------------|--------------|--------------|----------|--------------------|
|                        | (Mean, Standard Deviation) |              |              |          |                    |
|                        | T1                         | T2           | T3           |          |                    |
| 1-Methylnicotinamide   | 8.62 (2.13)                | 8.06 (1.84)  | 8.31 (1.99)  | 0.63     | 0.95               |
| 2-Aminobutyrate        | 3.78 (2.30)                | 3.95 (2.48)  | 3.82 (2.28)  | 0.88     | 0.99               |
| 2-Hydroxybutyrate      | 3.27 (1.93)                | 3.37 (2.02)  | 3.18 (1.87)  | 0.70     | 0.95               |
| 2-Hydroxyisovalerate   | 0.77 (1.75)                | 0.80 (1.78)  | 0.73 (1.62)  | 0.31     | 0.88               |
| 2-Ooglutarate          | 17.22 (2.03)               | 19.68 (2.18) | 15.60 (1.94) | 0.02     | 0.36               |
| 3-Aminoisobutyrate     | 14.44 (2.39)               | 16.02 (2.39) | 15.09 (2.33) | 0.43     | 0.90               |
| 3-Hydroxybutyrate      | 5.15 (2.44)                | 4.81 (2.01)  | 4.47 (1.65)  | 0.18     | 0.85               |
| 3-Hydroxyisovalerate   | 9.98 (1.82)                | 10.10 (1.63) | 9.44 (1.68)  | 0.40     | 0.90               |
| 3-Indoxylsulfate       | 29.98 (1.72)               | 32.64 (1.70) | 29.99 (1.78) | 0.27     | 0.88               |
| 4-Hydroxybenzoate      | 20.48 (1.94)               | 18.50 (2.02) | 19.35 (2.02) | 0.37     | 0.89               |
| 4-Hydroxyphenylacetate | 18.94 (1.66)               | 19.28 (1.63) | 19.04 (1.68) | 0.94     | 0.99               |
| Acetate                | 20.09 (2.95)               | 21.10 (2.57) | 20.94 (2.80) | 0.88     | 0.99               |

|                                                                                        |               |               |               |      |      |
|----------------------------------------------------------------------------------------|---------------|---------------|---------------|------|------|
| Acetoacetate                                                                           | 12.23 (2.00)  | 12.77 (2.01)  | 12.02 (1.72)  | 0.72 | 0.95 |
| Acetone                                                                                | 7.26 (4.24)   | 6.94 (3.14)   | 6.37 (3.04)   | 0.51 | 0.95 |
| Alanine                                                                                | 45.45 (1.92)  | 50.35 (1.79)  | 48.18 (1.75)  | 0.22 | 0.88 |
| Ascorbate                                                                              | 17.15 (4.58)  | 18.08 (4.26)  | 16.06 (3.64)  | 0.76 | 0.99 |
| Betaine                                                                                | 15.58 (2.88)  | 17.00 (3.13)  | 15.98 (2.95)  | 0.71 | 0.95 |
| Carnitine                                                                              | 7.80 (2.37)   | 8.14 (2.60)   | 7.98 (2.49)   | 0.92 | 0.99 |
| Choline                                                                                | 5.90 (1.79)   | 6.41 (1.66)   | 5.77 (1.74)   | 0.12 | 0.85 |
| Citrate                                                                                | 332.14 (1.83) | 370.58 (1.76) | 330.72 (1.85) | 0.16 | 0.85 |
| Creatine                                                                               | 150.98 (4.29) | 198.55 (3.79) | 194.33 (3.65) | 0.12 | 0.85 |
| Dimethylamine                                                                          | 63.38 (1.52)  | 64.40 (1.46)  | 62.74 (1.47)  | 0.79 | 0.99 |
| Ethanolamine                                                                           | 49.90 (1.40)  | 52.30 (1.42)  | 48.88 (1.39)  | 0.16 | 0.85 |
| Formate                                                                                | 59.19 (2.43)  | 66.15 (2.36)  | 62.28 (2.40)  | 0.48 | 0.95 |
| Fumarate                                                                               | 1.30 (2.18)   | 1.44 (2.39)   | 1.33 (2.13)   | 0.42 | 0.90 |
| Glucose                                                                                | 50.55 (1.66)  | 51.84 (1.67)  | 51.61 (1.66)  | 0.86 | 0.99 |
| Glycerol                                                                               | 32.93 (2.20)  | 37.52 (2.51)  | 36.06 (2.64)  | 0.35 | 0.89 |
| Glycine                                                                                | 209.28 (1.92) | 232.54 (1.79) | 219.78 (1.89) | 0.25 | 0.88 |
| Hippurate                                                                              | 175.51 (2.31) | 181.14 (2.32) | 165.90 (2.16) | 0.66 | 0.95 |
| Histidine                                                                              | 122.05 (1.80) | 133.17 (1.74) | 129.45 (1.79) | 0.28 | 0.88 |
| Hypoxanthine                                                                           | 10.07 (2.01)  | 11.36 (1.94)  | 8.90 (2.10)   | 0.01 | 0.36 |
| Isoleucine                                                                             | 2.22 (1.80)   | 2.23 (1.74)   | 2.17 (1.72)   | 0.90 | 0.99 |
| Lactate                                                                                | 14.89 (2.48)  | 14.94 (2.04)  | 14.74 (2.59)  | 0.99 | 0.99 |
| Leucine                                                                                | 3.84 (1.70)   | 3.84 (1.62)   | 3.83 (1.62)   | 1.00 | 0.99 |
| Lysine                                                                                 | 12.00 (2.31)  | 11.68 (2.00)  | 11.65 (2.19)  | 0.87 | 0.99 |
| Methanol                                                                               | 5.47 (2.65)   | 5.90 (2.56)   | 5.46 (2.62)   | 0.67 | 0.95 |
| O-Acetylcarnitine                                                                      | 4.02 (1.91)   | 4.33 (1.92)   | 3.91 (1.74)   | 0.34 | 0.89 |
| Propylene.glycol                                                                       | 11.93 (4.15)  | 13.42 (4.66)  | 13.61 (4.32)  | 0.72 | 0.95 |
| Quinolate                                                                              | 6.58 (1.76)   | 6.60 (1.59)   | 6.09 (1.59)   | 0.30 | 0.88 |
| Succinate                                                                              | 26.65 (2.43)  | 26.60 (2.52)  | 28.52 (2.35)  | 0.60 | 0.95 |
| Taurine                                                                                | 78.23 (2.45)  | 78.46 (2.26)  | 79.58 (2.30)  | 0.98 | 0.99 |
| Threonine                                                                              | 19.49 (1.76)  | 22.38 (1.75)  | 20.81 (1.68)  | 0.07 | 0.81 |
| Trigonelline                                                                           | 9.68 (2.43)   | 8.47 (2.39)   | 10.11 (2.34)  | 0.14 | 0.85 |
| Trimethylamine.N.oxide                                                                 | 35.68 (2.19)  | 38.28 (1.90)  | 32.01 (1.83)  | 0.07 | 0.81 |
| Tryptophan                                                                             | 9.61 (1.62)   | 9.56 (1.66)   | 10.00 (1.58)  | 0.67 | 0.95 |
| Valine                                                                                 | 6.17 (1.69)   | 6.41 (1.66)   | 6.21 (1.62)   | 0.70 | 0.95 |
| Cis-Aconitate                                                                          | 34.71 (1.53)  | 37.27 (1.55)  | 35.15 (1.53)  | 0.23 | 0.88 |
| II-Methylhistidine                                                                     | 25.31 (1.39)  | 26.01 (1.36)  | 25.05 (1.53)  | 0.61 | 0.95 |
| *Unadjusted P-value                                                                    |               |               |               |      |      |
| **P-value was adjusted for multiple comparisons using the Benjamini-Hochberg procedure |               |               |               |      |      |

**Table S2.** Intraclass correlation for each metabolite

| Metabolite         | ICC   | Within Subject Variance | Between Subject Variance |
|--------------------|-------|-------------------------|--------------------------|
| Succinate          | 0.528 | 0.416                   | 0.371                    |
| Acetone            | 0.477 | 0.736                   | 0.807                    |
| 3.Aminoisobutyrate | 0.470 | 0.348                   | 0.393                    |
| Glucose            | 0.448 | 0.116                   | 0.143                    |
| Isoleucine         | 0.444 | 0.14                    | 0.175                    |
| Betaine            | 0.442 | 0.528                   | 0.667                    |
| Lysine             | 0.437 | 0.26                    | 0.335                    |
| Valine             | 0.436 | 0.11                    | 0.143                    |
| Histidine          | 0.434 | 0.144                   | 0.188                    |
| Choline            | 0.423 | 0.128                   | 0.174                    |
| Dimethylamine      | 0.421 | 0.065                   | 0.089                    |

|                        |       |       |       |
|------------------------|-------|-------|-------|
| Tryptophan             | 0.418 | 0.097 | 0.135 |
| Alanine                | 0.413 | 0.149 | 0.212 |
| Acetate                | 0.396 | 0.411 | 0.628 |
| Fumarate               | 0.396 | 0.256 | 0.39  |
| Leucine                | 0.377 | 0.093 | 0.154 |
| 4.Hydroxyphenylacetate | 0.377 | 0.096 | 0.159 |
| 3.Hydroxyisovalerate   | 0.375 | 0.108 | 0.179 |
| Glycine                | 0.365 | 0.142 | 0.248 |
| Methanol               | 0.354 | 0.326 | 0.595 |
| cis.Aconitate          | 0.348 | 0.064 | 0.121 |
| Formate                | 0.333 | 0.254 | 0.509 |
| Lactate                | 0.333 | 0.248 | 0.497 |
| 4.Hydroxybenzoate      | 0.332 | 0.158 | 0.317 |
| 1.Methylnicotinamide   | 0.323 | 0.153 | 0.32  |
| 2.Aminobutyrate        | 0.321 | 0.234 | 0.495 |
| 2.Oxoglutarate         | 0.319 | 0.167 | 0.357 |
| 3.Hydroxybutyrate      | 0.319 | 0.163 | 0.348 |
| Glycerol               | 0.318 | 0.256 | 0.55  |
| Ethanolamine           | 0.305 | 0.035 | 0.079 |
| 2.Hydroxybutyrate      | 0.303 | 0.133 | 0.306 |
| Creatine               | 0.29  | 0.541 | 1.324 |
| 3.Indoxylsulfate       | 0.284 | 0.086 | 0.217 |
| ?-Methylhistidine      | 0.278 | 0.035 | 0.092 |
| Threonine              | 0.272 | 0.082 | 0.22  |
| Trigonelline           | 0.263 | 0.2   | 0.559 |
| Quinolate              | 0.252 | 0.063 | 0.187 |
| Taurine                | 0.243 | 0.174 | 0.542 |
| Citrate                | 0.242 | 0.086 | 0.27  |
| Trimethylamine.N.oxide | 0.237 | 0.111 | 0.358 |
| Ascorbate              | 0.23  | 0.464 | 1.557 |
| Hypoxanthine           | 0.22  | 0.11  | 0.391 |
| Carnitine              | 0.195 | 0.161 | 0.665 |
| O.Acetylcarnitine      | 0.188 | 0.072 | 0.311 |
| 2.Hydroxyisovalerate   | 0.178 | 0.052 | 0.242 |
| Acetoacetate           | 0.155 | 0.065 | 0.354 |
| Propylene.glycol       | 0.144 | 0.314 | 1.859 |
| Hippurate              | 0.122 | 0.081 | 0.585 |

**Table S3.** P-values for the likelihood ratio test for the full adjusted model compared with the null models.

| Metabolite | KEGG ID | Unadjusted p value | Benjamini-Hochberg adjusted p-values |
|------------|---------|--------------------|--------------------------------------|
|------------|---------|--------------------|--------------------------------------|

|                               |        |      |      |
|-------------------------------|--------|------|------|
| 1-Methylnicotinamide          | C02918 | 0.02 | 0.52 |
| 3-Hydroxybutyrate             | C01089 | 0.03 | 0.52 |
| Trimethylamine-N-oxide (TMAO) | C01104 | 0.04 | 0.52 |
| Citrate                       | C00158 | 0.06 | 0.52 |
| Quinolate                     | C03722 | 0.06 | 0.52 |
| Betaine                       | C00719 | 0.07 | 0.52 |
| Histidine                     | C00135 | 0.11 | 0.65 |
| 3-Indoxylsulfate              | N/A    | 0.13 | 0.65 |
| Glycine                       | C00037 | 0.15 | 0.65 |
| Ethanolamine                  | C00189 | 0.19 | 0.65 |
| Hippurate                     | C01586 | 0.2  | 0.65 |
| Cis-Aconitate                 | C00417 | 0.2  | 0.65 |
| Choline                       | C00114 | 0.21 | 0.65 |
| $\tau$ -Methylhistidine       | C01152 | 0.21 | 0.65 |
| Dimethylamine                 | C00543 | 0.22 | 0.65 |
| 2-Oxoglutarate                | C00026 | 0.23 | 0.65 |
| 2-Hydroxyisovalerate          | N/A    | 0.24 | 0.65 |
| Isoleucine                    | C00407 | 0.25 | 0.65 |
| Methanol                      | C00132 | 0.27 | 0.65 |
| 4-Hydroxybenzoate             | C00156 | 0.28 | 0.65 |
| Formate                       | C00058 | 0.28 | 0.65 |
| Carnitine                     | C00318 | 0.3  | 0.65 |
| Acetoacetate                  | C00164 | 0.32 | 0.65 |
| Hypoxanthine                  | C00262 | 0.32 | 0.65 |
| O-Acetylcarnitine             | C02571 | 0.35 | 0.66 |
| Tryptophan                    | C00078 | 0.37 | 0.66 |
| 2-Aminobutyrate               | C02356 | 0.38 | 0.66 |
| Lysine                        | C00047 | 0.39 | 0.66 |
| Ascorbate                     | C00072 | 0.4  | 0.66 |
| Fumarate                      | C00122 | 0.43 | 0.66 |
| Glucose                       | C00031 | 0.44 | 0.66 |
| Glycerol                      | C00116 | 0.44 | 0.66 |
| Trigonelline                  | C01004 | 0.49 | 0.71 |

|                        |        |      |      |
|------------------------|--------|------|------|
| Lactate                | C00186 | 0.5  | 0.71 |
| 3-Hydroxyisovalerate   | N/A    | 0.53 | 0.73 |
| Valine                 | C00183 | 0.54 | 0.73 |
| Creatine               | C00300 | 0.61 | 0.78 |
| Acetate                | C00033 | 0.62 | 0.78 |
| Succinate              | C00042 | 0.64 | 0.78 |
| Alanine                | C00041 | 0.65 | 0.78 |
| Propylene-glycol       | C00583 | 0.68 | 0.79 |
| 2-Hydroxybutyrate      | C05984 | 0.69 | 0.79 |
| Acetone                | C00207 | 0.73 | 0.80 |
| Leucine                | C00123 | 0.74 | 0.80 |
| 3-Aminoisobutyrate     | C05145 | 0.75 | 0.80 |
| Threonine              | C00188 | 0.77 | 0.81 |
| Taurine                | C00245 | 0.87 | 0.88 |
| 4-Hydroxyphenylacetate | C00642 | 0.88 | 0.88 |
